# Supplementary material for: Developmental Stage-Dependent Changes in Mitochondrial Function in the Brain of Offspring Following Prenatal Maternal Immune Activation
Source: MDPI journal article supplement (doi:10.3390/ijms24087243), 2023-04-14
Supplement: s1 [file s1]

**Supplementary Table S1.** The mean CT data for *Actb* obtained in the real-time PCR experiments.

|         | Fetuses | 7-day-old | 54-day-old |
|---------|---------|-----------|------------|
| control | 20.075  | 15.106    | 19.097     |
| MIA     | 19.908  | 15.094    | 19.392     |
